# Supplementary material
Source: publisher figshare collection journal article supplement (https://frontiersin.figshare.com/ndownloader/files/15279551)
Supplement: Supplementary file [file 15279551]

**Table S9** The downregulated proteins in the 10% NaCl group compared with the control group, and the upregulated proteins in the 20% NaCl group compared with the 10% NaCl group.

| Accession Number | Protein Name                                                                                                     | Gene Name              | Fold Change   |               |
|------------------|------------------------------------------------------------------------------------------------------------------|------------------------|---------------|---------------|
|                  |                                                                                                                  |                        | 10% NaCl<br>↓ | 20% NaCl<br>↑ |
| A0A0E1AHK4       | Foldase protein PrsA                                                                                             | <i>prsA</i>            | 0.44          | 2.03          |
| A0A0E1AE25       | Phosphoglycolate phosphatase                                                                                     | <i>SAZ172_0574</i>     | 0.45          | 1.20          |
| A0A0D1IXM8       | Small heat shock protein                                                                                         | <i>QU38_07680</i>      | 0.48          | 1.70          |
| A0A090LY09       | GTPase Obg                                                                                                       | <i>obg</i>             | 0.50          | 1.40          |
| A0A090LZA4       | Chorismate mutase I/2-keto-3-deoxy-D-arabino-heptulosonate-7-phosphate synthase I beta%2C AroH/AroA I beta       | <i>aroA</i>            | 0.52          | 1.24          |
| A0A090N1X3       | Chaperone protein DnaK                                                                                           | <i>dnaK</i>            | 0.58          | 1.79          |
| A0A077W554       | Membrane associated protein                                                                                      | <i>ERS140026_02425</i> | 0.60          | 1.33          |
| A0A0D6H2B5       | Salicylate hydroxylase                                                                                           | <i>nagX</i>            | 0.68          | 1.31          |
| A0A0D1FPR0       | 3-hydroxyacyl-[acyl-carrier-protein] dehydratase FabZ                                                            | <i>fabZ</i>            | 0.72          | 1.45          |
| A0A0B6XQX6       | Bifunctional protein: zinc-containing alcohol dehydrogenase%3B quinone oxidoreductase ( NADPH:quinone reductase) | <i>ERS094548_01069</i> | 0.73          | 1.50          |
| A0A090LZZ7       | Uncharacterized peptidase YqhT                                                                                   | <i>YqhT</i>            | 0.76          | 1.24          |
| A0A0D1IBM2       | DEAD-box ATP-dependent RNA helicase CshA                                                                         | <i>cshA</i>            | 0.77          | 1.50          |
| A0A0D6H5T9       | NAD-dependent protein deacetylase                                                                                | <i>cobB</i>            | 0.77          | 1.79          |
| A0A0D6DLY3       | Pyrroline-5-carboxylate reductase                                                                                | <i>proC</i>            | 0.78          | 1.71          |
| A0A0D6DFF7       | Uncharacterized protein                                                                                          | <i>SAJPND1_01888</i>   | 0.80          | 1.21          |
| A0A0C5I2R4       | Peptidase propeptide and YPEB domain-containing protein                                                          | <i>ERS445051_01691</i> | 0.80          | 1.25          |
| A0A0D1HD79       | tRNA binding domain protein                                                                                      | <i>SAJPND1_01690</i>   | 0.80          | 1.81          |
| A0A0D1I2B3       | Chaperone protein DnaJ                                                                                           | <i>dnaJ</i>            | 0.80          | 1.81          |
| A0A0D1HV16       | Putative cytosolic protein                                                                                       | <i>QU38_12695</i>      | 0.81          | 1.70          |
| A0A077ULT9       | Ribonuclease R                                                                                                   | <i>mrn</i>             | 0.83          | 1.30          |
